# Supplementary material for: Einflussfaktoren auf die frühe Mutter-Kind-Interaktion
Source: Atypon-hosted journal article supplement (doi:10.1026/2191-9186/a000664), 2024-04-01
Supplement: 2191-9186_a000664_esm1.pdf [file 2191-9186_a000664_esm1.pdf]

## Tabelle E1 – Elektronisches Supplement 1

*Operationalisierungen der Verhaltensmerkmale der Mutter-Kind-Interaktion (vgl. ausführlich Linberg et al., 2019)*

| Verhalten                                             | Operationalisierung                                                                                                                                                                                                                                                                                                                                                                                                           |
|-------------------------------------------------------|-------------------------------------------------------------------------------------------------------------------------------------------------------------------------------------------------------------------------------------------------------------------------------------------------------------------------------------------------------------------------------------------------------------------------------|
| <b>Mütterliche Interaktionsmerkmale</b>               |                                                                                                                                                                                                                                                                                                                                                                                                                               |
| Sensitivität bei emotionaler Entspanntheit des Kindes | Diese Skala erfasst, wie der Elternteil soziale Gesten und Ausdrücke des Kindes, die Signale emotionaler Entspanntheit sind, wahrnimmt und sowohl angemessen als auch prompt darauf reagiert. Dazu zählt auch, ob das Bedürfnis des Kindes nach Interaktion berücksichtigt wird. Das Verhalten des Elternteils ist demnach kindzentriert.                                                                                     |
| Anregung                                              | Diese Skala erfasst, wie anregend die Interaktion des Elternteils mit dem Kind ist.                                                                                                                                                                                                                                                                                                                                           |
| <b>Kindliche Interaktionsmerkmale</b>                 |                                                                                                                                                                                                                                                                                                                                                                                                                               |
| Positive Stimmung                                     | Diese Skala erfasst, in welchem Ausmaß das Kind die Situation im Ganzen genießt, zufrieden und „gut gelaunt“ ist. Das untere Ende der Skala (Stufe 1) überlappt mit dem unteren Ende der Skala (negative Stimmung) und ist als „neutrale Stimmung“ (gleichgültig, keine beobachtbaren Gefühlsäußerungen) definiert.                                                                                                           |
| Negative Stimmung                                     | Diese Skala erfasst, inwiefern das Kind negative Gefühle (in Form von Unzufriedenheit, Ärger) während der Beobachtung zeigt. Neben beobachtbarer körperlicher Anspannung wurden hier hauptsächlich sämtliche negative Lautäußerungen gewertet.                                                                                                                                                                                |
| Motorische Aktivität                                  | Diese Skala erfasst, wie motorisch aktiv und wie unruhig sich das Kind während der Beobachtung zeigt. Neben der Häufigkeit grobmotorischer Aktivitäten wurde hier besonders auf deren Geschwindigkeit und Energiegeladenheit bzw. die Körperspannung geachtet. Langsame oder weniger energiegeladene Bewegungen wurden verhältnismäßig weniger stark gewertet. Für das finale Rating steht der Gesamteindruck im Vordergrund. |
| Anhaltende Aufmerksamkeit                             | Diese Skala erfasst, wie anhaltend die Aufmerksamkeit des Kindes gegenüber Objekten und nicht-sozialen Aktivitäten ist. Hier geht es um die Fähigkeit des Kindes, sich eine Zeit lang auf eine Sache zu konzentrieren und nicht schnell von einer Sache zur nächsten zu springen. Es geht um den Gesamteindruck, den das Kind hinsichtlich seiner Ausdauer vermittelt.                                                        |
| Soziale Verbundenheit                                 | Diese Skala erfasst, wie zugewandt das Kind zum Elternteil ist, wie viel Interesse es also zeigt. Ausgangspunkt der Bewertung der Verbundenheit ist das Kind.                                                                                                                                                                                                                                                                 |
