# Supplementary material for: Einflussfaktoren auf die frühe Mutter-Kind-Interaktion
Source: Atypon-hosted journal article supplement (doi:10.1026/2191-9186/a000664), 2024-04-01
Supplement: 2191-9186_a000664_esm2.pdf [file 2191-9186_a000664_esm2.pdf]

**Tabelle E2 – Elektronisches Supplement****2 Deskriptive Statistik aller**

| <i>Studienvariablen</i>                     | <i>M/%</i>                                        | <i>SD</i> | <i>Minimum</i> | <i>Maximum</i> | <i>Anteil der Missings in %<sup>a</sup></i> |
|---------------------------------------------|---------------------------------------------------|-----------|----------------|----------------|---------------------------------------------|
| <b>Kontrollvariablen</b>                    |                                                   |           |                |                |                                             |
| Alter Mutter                                | 32.70                                             | 5.29      | 19             | 48             | 0,7                                         |
| Alter Kind (in Tagen)                       | 221.61                                            | 25.95     | 177            | 314            | 0,7                                         |
| Geschlecht Kind                             | 46 % Jungen                                       |           |                |                | 8,6                                         |
| <b>Merkmale der Mutter-Kind-Interaktion</b> |                                                   |           |                |                |                                             |
| Mutter: Sensitivität                        | 3.97                                              | 0.72      | 2              | 5              | 0                                           |
| Mutter: Anregung                            | 3.20                                              | 0.95      | 1              | 5              | 0                                           |
| Kind: Positive Stimmung                     | 3.03                                              | 0.73      | 1              | 5              | 0                                           |
| Kind: Negative Stimmung                     | 1.45                                              | 0.83      | 1              | 5              | 0                                           |
| Kind: Motorische Aktivität                  | 3.11                                              | 0.85      | 1              | 5              | 0                                           |
| Kind: Anhaltende Aufmerksamkeit             | 3.54                                              | 0.96      | 1              | 5              | 0                                           |
| Kind: Soziale Verbundenheit                 | 3.39                                              | 0.64      | 2              | 5              | 0                                           |
| <b>Familiäre Hintergrundvariablen</b>       |                                                   |           |                |                |                                             |
| Schulabschluss Mutter                       | 4.09                                              | 1.10      | 1              | 5              | 15,8                                        |
| Haushaltseinkommen (in €)                   | 2 929.90                                          | 143.33    | 200            | 7 600          | 13,2                                        |
| Haushaltssprache                            | 76 % Deutsch                                      |           |                |                | 3,9                                         |
| <b>Förderprogramme</b>                      |                                                   |           |                |                |                                             |
| TippTapp                                    | 0.79                                              | 0.77      | 0              | 2              | 0                                           |
| Eltern-Kind-Programm                        | 8,6 % haben ein Eltern-Kind-Programm genutzt      |           |                |                | 0                                           |
| Weitere Förderangebote                      | 64,5 % haben kein weiteres Förderprogramm genutzt |           |                |                | 0                                           |

*Anmerkung.* <sup>a</sup>Die fehlenden Werte beziehen sich auf die final analysierte Stichprobe von  $N = 152$  BRISE-Familien, wobei diese fehlenden Werte mit FIML berücksichtigt wurden.

**Tabelle E3 – Elektronisches Supplement 2***Bivariate Korrelationen aller Studienvariablen*

| Variablen                      | 1    | 2     | 3     | 4     | 5     | 6     | 7     | 8    | 9    | 10    | 11    | 12    | 13   | 14   | 15  |
|--------------------------------|------|-------|-------|-------|-------|-------|-------|------|------|-------|-------|-------|------|------|-----|
| 1 Alter Mutter                 | –    |       |       |       |       |       |       |      |      |       |       |       |      |      |     |
| 2 Alter Kind                   | -.01 | –     |       |       |       |       |       |      |      |       |       |       |      |      |     |
| 3 Geschlecht Kind              | -.08 | .13   | –     |       |       |       |       |      |      |       |       |       |      |      |     |
| 4 Mutter: Sensitivität         | .29* | .02   | .12   | –     |       |       |       |      |      |       |       |       |      |      |     |
| 5 Mutter: Anregung             | .08  | -.14  | -.05  | .48*  | –     |       |       |      |      |       |       |       |      |      |     |
| 6 Kind: Positive Stimmung      | .07  | .13   | .14   | .13   | .02   | –     |       |      |      |       |       |       |      |      |     |
| 7 Kind: Negative Stimmung      | -.07 | -.06  | -.14  | -.08  | .08   | -.70* | –     |      |      |       |       |       |      |      |     |
| 8 Kind: Motorische Aktivität   | .18* | .29*  | -.04  | .16*  | -.12  | .12   | -.14  | –    |      |       |       |       |      |      |     |
| 9 Kind: Aufmerksamkeit         | .23* | -.21* | .12   | .16*  | -.02  | .07   | -.01  | -.13 | –    |       |       |       |      |      |     |
| 10 Kind: Soziale Verbundenheit | .05  | -.13  | .04   | .25*  | .33*  | .33*  | -.15  | -.07 | .22* | –     |       |       |      |      |     |
| 11 Schulabschluss Mutter       | .14  | -.11  | .09   | .38*  | .10   | .11   | -.15  | .18* | .20* | -.01  | –     |       |      |      |     |
| 12 Haushaltseinkommen          | .30* | .10   | .04   | .29*  | .09   | -.12  | .11   | .15  | .15  | -.19* | .30*  | –     |      |      |     |
| 13 Haushaltssprache            | -.15 | .00   | -.17* | -.32* | -.19* | -.14  | .10   | -.14 | -.11 | -.03  | -.20* | -.21* | –    |      |     |
| 14 TippTapp                    | .09  | .21*  | -.01  | .19*  | .06   | .09   | .00   | .23* | -.07 | -.03  | .08   | .24*  | -.02 | –    |     |
| 15 Eltern-Kind-Programm        | .18* | .04   | -.05  | .04   | -.07  | .05   | -.08  | .07  | .05  | -.04  | .05   | .00   | -.01 | -.01 | –   |
| 16 Weitere Förderangebote      | .10  | .16*  | .13   | .15*  | -.06  | .10   | -.18* | .16* | -.04 | -.11  | .19*  | .28*  | -.04 | .21* | .13 |

*Anmerkungen.* Geschlecht Kind: 1 = männlich, 2 = weiblich. Haushaltssprache: 1 = vorwiegend Deutsch, 2 = vorwiegend nicht Deutsch. TippTapp: 0 = kein TippTapp genutzt, 1 = 1 Termin genutzt, 2 = 2 Termine genutzt. Eltern-Kind-Programm: 0 = nicht genutzt, 1 = genutzt. Weitere Förderangebote: 0 = es wurde kein weiteres Förderprogramm genutzt, 1 = es wurden weitere Förderprogramme genutzt.
